# Supplementary material
Source: publisher site journal article supplement (https://www.dovepress.com/article/497602)
Supplement: Supplementary file 1 [file get_supplementary_file.php]

Supplementary Table 1 Training Paradigm and target cognition in the study

| **Game Name** | **Training Dimension** | **Source Paradigm** |
| --- | --- | --- |
| Flight Path Planning | Reaction Speed | Choice Reaction Time |
| Forest Surveillance | Reaction Speed | Choice Reaction Time |
| Monkey Spotting | Attention | Multiple Object Tracking |
| Fruit Stacking | Attention | Divided Attention |
| Where Is It Remembered | Memory | Corsi Block-Tapping Test |
| Invasion World | Memory/ Executive Function | N-Back Test |
| Can You Remember? | Memory | Paired-Associate Learning |
| Disappearing Fruits | Memory | Paired-Associate Learning |
| Memory Palace | Memory | Paired-Associate Learning |
| Color Monsters | Executive Function | Stroop Task |
| Absorbing Planets | Logical Reasoning | Planning Task |
| Repairing Bridges | Logical Reasoning | Jigsaw |
| Professional Designer | Logical Reasoning | Jigsaw |
